# Supplementary material for: Marine organic matter in the remote environment of the Cape Verde islands – an introduction and overview to the MarParCloud campaign
Source: Copernicus journal article supplement (doi:10.5194/acp-20-6921-2020), 2020-06-12
Supplement: Supplementary file 1 [file acp-20-6921-2020-supplement.pdf]

Supplement of Atmos. Chem. Phys., 20, 6921–6951, 2020  
<https://doi.org/10.5194/acp-20-6921-2020-supplement>  
© Author(s) 2020. This work is distributed under  
the Creative Commons Attribution 4.0 License.

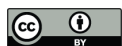

*Supplement of*

## **Marine organic matter in the remote environment of the Cape Verde islands – an introduction and overview to the MarParCloud campaign**

**Manuela van Pinxteren et al.**

*Correspondence to:* Manuela van Pinxteren (manuela@tropos.de) and Hartmut Herrmann (herrmann@tropos.de)

The copyright of individual parts of the supplement might differ from the CC BY 4.0 License.

1

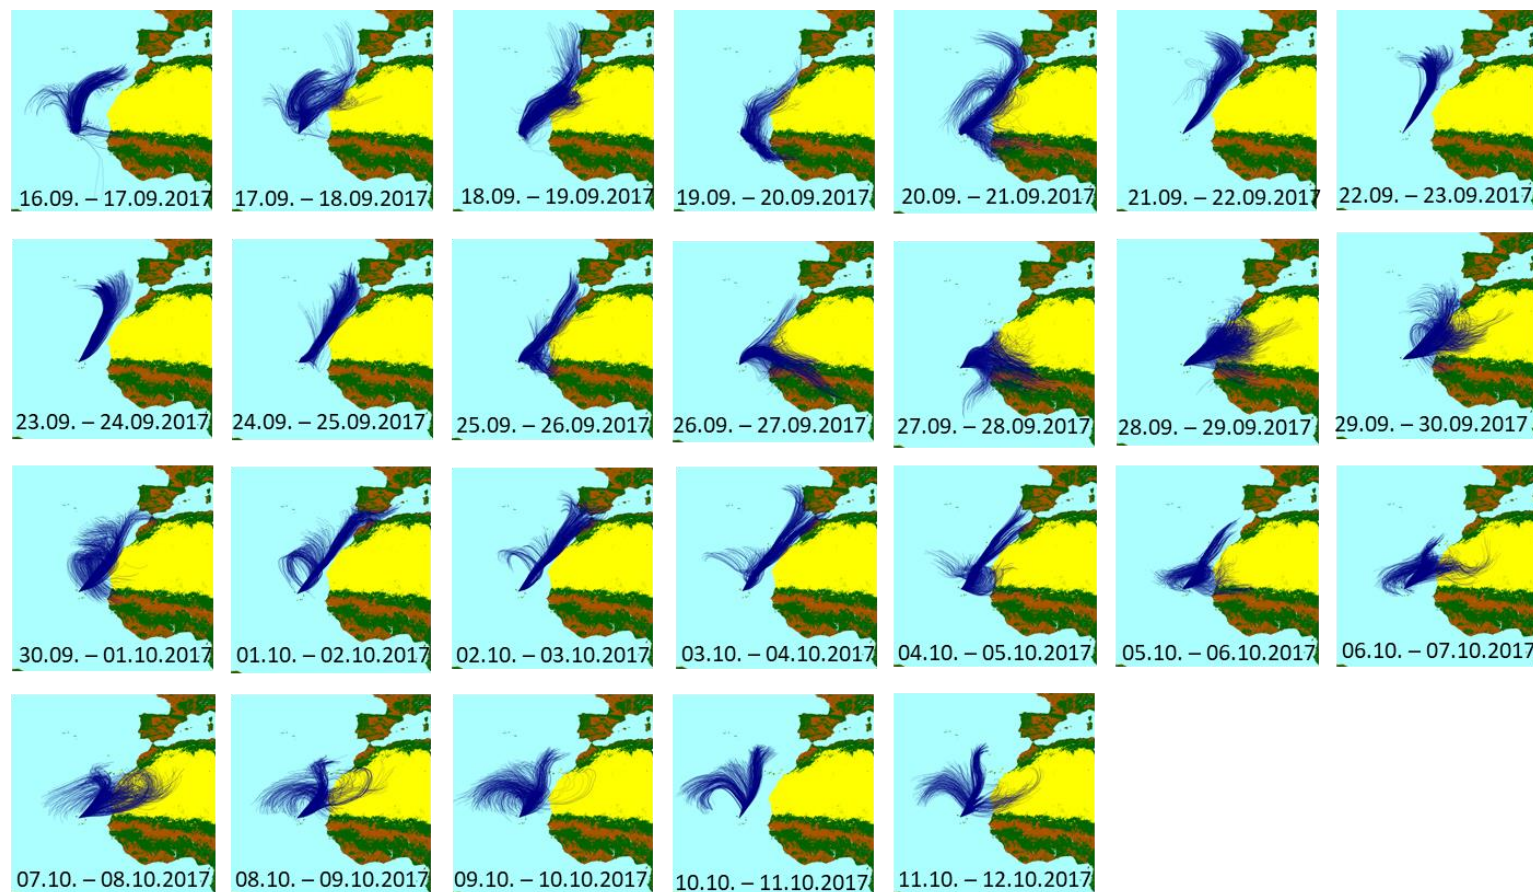

2

3

4 Fig. S1: 96 hour back trajectories calculated on an hourly basis within the intervals of the aerosol particle filter sampling at the CVAO, using the  
 5 NOAA HYSPLIT model (HYbrid Single-Particle Lagrangian Integrated Trajectory, <http://www.arl.noaa.gov/ready/hysplit4.html>, 26.07.19) in the  
 6 ensemble mode at an arrival height of  $500 \text{ m} \pm 200 \text{ m}$  ((van Pinxteren, et al. 2010)). Starting time of the trajectories corresponded with the sampling  
 7 time of the aerosol particles and was 21.00 UTC from 16<sup>th</sup> – 21<sup>st</sup> September and 16.00 UTC from 22<sup>nd</sup> September – 12<sup>th</sup> October.

## 8 **Helikite**

9 The measurements were done next to the CVAO using a Helikite (Allsopp Helikites Ltd,  
10 Hampshire, UK). A Helikite is a unique combination of a tethered balloon and a kite. Helikites  
11 are designed to be operated under extreme weather conditions. They fly stable even in strong  
12 winds and due to the kite wing additional lift is generated in windy conditions. For the  
13 measurements at the CVAO a 16 m<sup>3</sup> Skyhook Helikite was used. The kite was attached to a 3  
14 mm Dyneema rope (2000m long, ~ 4,6kg/1000m, Lyros D-Pro 3mm, breaking load 950 daN,  
15 working elongation < 1%) and operated by a winch (TROPOS built). Under calm conditions  
16 the Helikite has a net load capacity of ~ 8kg. At windy conditions the pull increases significantly  
17 and reaches about 16 kg at 6 m s<sup>-1</sup>. Depending on the prevailing conditions, measurements up  
18 to an altitude of about 1000 m could be carried out. The payload with meteorological sensors  
19 was attached to rope about 20 m below the helikite. The payload here was a measuring system  
20 for standard meteorological parameters (p, T, rH, wind direction and velocity). The device is  
21 based on a microcontroller-based data logger (TROPOS). The sensors were digital sensors,  
22 tested and selected in the TROPOS wind tunnel (LACIS-T). Wind speed was measured using  
23 a differential pressure sensor together with a pitot tube, wind direction was determined from an  
24 orientation sensor (compass) of the wind vane. Data were recorded with a measuring frequency  
25 of 2 Hz, stored on SD card and additionally transmitted to a ground station (via XBee). In total  
26 19 flights measured at 10 days are available.

27

## 28 **Meteorological parameters and trace gases**

29 Temperature, relative humidity and wind measurements were measured using a meteorological  
30 station fitted with various sensors (Campbell Scientific Ltd, UK).

31 Ozone was measured using a UV absorption instrument (Model 49i Thermo Scientific).

32 VOCs and OVOCs were measured using a dual channel gas chromatograph with flame  
33 ionization detection (Agilent 7890-A). The instrument has two parallel columns, which  
34 simultaneously resolve C<sub>2</sub>- C<sub>8</sub> NMHCs and o-VOCS methanol and acetone using a more polar  
35 LOWOX column. VOCs are pre-concentrated onto a multi-adsorbent bed at -30 °C and then  
36 rapidly desorbed at 350 °C into helium flow using a desorption unit (Markes International  
37 Unity2). NMHCs are calibrated monthly using a multicomponent hydrocarbon standard  
38 (National Physics Laboratory, UK, typical concentrations ~ 5 ppbV) whilst for OVOCs a  
39 permeation system is used for calibration at levels of 8 to 25 ppbv in conjunction with relative  
40 detector response. Weighings of the OVOC permeation tubes are typically carried out every 6  
41 weeks. The accuracy of the OVOC calibration is estimated as 10% for methanol and 5% for  
42 acetone. DMS was measured using a gas chromatograph with mass spectrometric detection  
43 (Agilent 7890-A, 5977 MSD). A Unity2 (Markes International) was used for the  
44 preconcentration of DMS onto a Tenax trap at -30° C which was desorbed at 350 °C into a flow  
45 of helium onto the GC. DMS was calibrated every ten hours during the campaign using a  
46 working standard manufactured at the University of York and quantified using relative detector  
47 response to benzene (10 ppm DMS standard, Korea Research Institute of Standards and  
48 Science, Republic of Korea (KRISS)). All trace gas and meteorological measurements were  
49 made from a height of 17.5 m asl.

50

51

## 52 **Plunging waterfall tank at the CVAO**

53 The tank was designed to study the bubble driven transfer of organic material from the bulk  
54 water via the SML into the aerosol phase. It consisted of a 1400 L basin with a 500 L aerosol  
55 chamber on top. The basin (120 cm length x 110 cm width x 100 cm height) was made of 10  
56 mm polyvinyl chloride (PVC) plates, held together by an aluminum frame. One side was  
57 transparent allowing for visual inspection. To minimize contamination from the tank walls, the  
58 entire basin was lined with a Teflon FEP bag. Inlet and sampling ports were made from  
59 Swagelok stainless steel fittings. PVC in contact with seawater was rinsed with artificial  
60 seawater for at least two weeks prior to use inside the basin. The head air space was made of  
61 Teflon FEP and had a total volume of 500 L (60 cm length, 110 cm width, 60 cm height).  
62 Sampling ports for bulk water and the SML were located on top of the basin. Bulk water  
63 samples were taken from 50 cm above the bottom and sampled into 1 L Duran glass bottles  
64 through a Teflon PFA tube using the hydrostatic pressure. Prior to each sampling, the tubing  
65 was first flushed with 100 mL of bulk water. SML samples were taken with a boron silicate  
66 glass plate (4 mm, 15 x 60 cm) via a slit in the enclosure. The SML sampling volume was  
67 limited to about 55 mL, corresponding to SML loss by about 50% when assuming SML layer  
68 thickness to be 60 to 80  $\mu\text{m}$  (Falkowska 1999). The glass plate was cleaned with ultrapure water  
69 and ethanol prior to each sampling. Bubble driven transport of organic material was simulated  
70 using a skimmer on a plunging waterfall. The plunging waterfall (Fig. SI3) was made from a  
71 tubular pump (Osaga ORP 25000) that was placed at the bottom of the tank and a PVC tube of  
72 100 cm length and 10 cm inner diameter. The tube towered 40 cm above the water surface.  
73 Water was pumped at a flow rate of approximately  $200 \text{ L min}^{-1}$  through the tube. The large  
74 diameter of the tubular pump and the tube ensured resulted in small pressure fluctuations and  
75 hence prevent the pelagic phytoplankton and microbial community from damage. The falling  
76 seawater simulated the process of wave breaking and was assumed to mimic the natural size  
77 spectra of rising air bubbles. A stainless steel inlet was inserted in the headspace of the tank and  
78 connected with three filter holders for offline aerosol particle sampling without size segregation  
79 (TSP). In addition, the stainless steel inlet was connected to a SMPS (same type as used for  
80 ambient aerosol particle characterisation) for online aerosol measurements. This method of  
81 aerosol generation resulted in a very efficient generation of nascent sea salt aerosols with  
82 aerosol particle size spectra centred around 100 nm as shown in Figure S2.

83

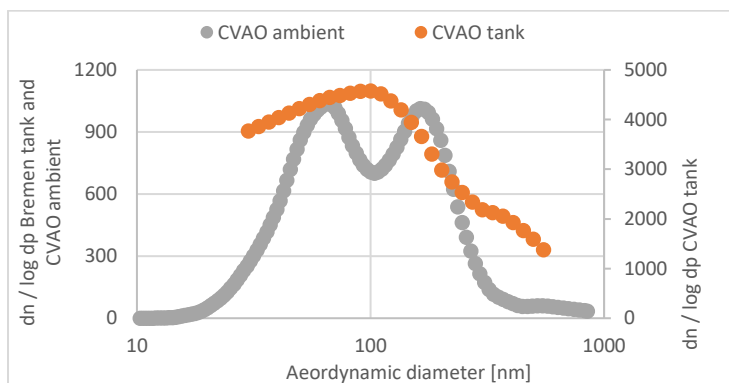

84

85 Fig. S2: Size distribution of the aerosols generated in the tank experiments in comparison to  
86 the size distribution of ambient aerosols at the CVAO.

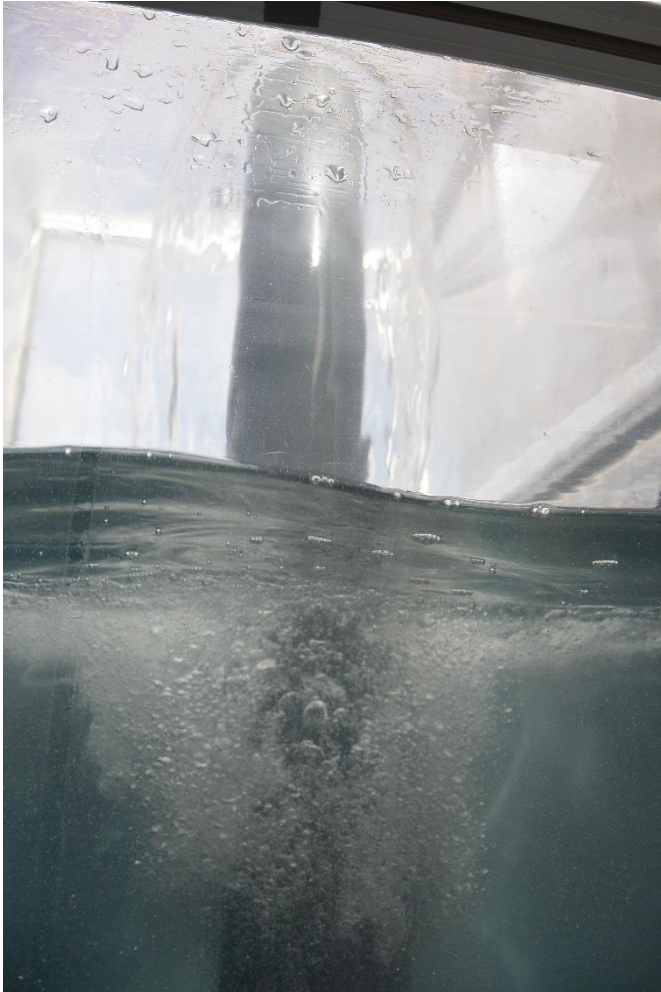

87

88 Fig. S3: *View of the plunging waterfall.*

89

### 90 **The MarParCat**

91 The MarParCat is a remotely controllable catamaran designed as a platform for water and SML  
92 sampling. It has a size of 245 x 180 x 140(l, w, h) and a total weight of 125 kg. The payload is  
93 approximately 160 kg. The catamaran is made from two Technus PE-floats (Type 90/150, 245  
94 x 31 x 38 cm) hold together by an aluminum frame. The catamaran is powered with a 12V  
95 outboard motor (Minn Kota Traxxis 55) and uses two 12V 60 Kwh lead batteries for power  
96 supply.

97 The SML is sampled by means of rotating glass plates (Duran, DWK Life Sciences, Germany).  
98 The glass plates have a diameter of 60cm and are placed 10 cm above the water surface in the  
99 gravity center of the catamaran. The plates rotated at a speed of 8 rpm. Depending of the  
100 thickness of the SML the sampling volume typically varied between 80 and 120 ml min<sup>-1</sup>  
101 allowing to sample about 10 L SML within 2 h. The water collected in the wiper was transferred  
102 into 2x 5 L Duran glass bottles with a peristaltic pump (Verder M25, 12V. Prior sampling the  
103 SML sampling device was flushed for at least 15 minutes at the sampling site. Bulk water  
104 samples were collected at a rate of 120 ml min<sup>-1</sup> from a depth of 70 cm using a peristaltic pump  
105 (Verder M25, 12V) and collected in two 5 L Duran glass bottles. The material of the tubing is  
106 Teflon PFA.

107 During the campaign, the catamaran was towed to the sampling site with a fishing boat and  
108 typically operated 20 m apart from the fishing boat where manual SML sampling took place.  
109

### 110 **Aerosol particle sampling and chemical analysis of inorganic ions, OC/EC and WSOC**

111 Aerosol particles (PM<sub>1</sub> and PM<sub>10</sub>) were collected on preheated 150 mm quartz fiber filters  
112 (Minktel, MK 360) at a flow rate of 700 L min<sup>-1</sup>. Size-resolved aerosol particles were sampled  
113 on pre-combusted aluminium rings with a Berner impactor. To avoid condensation of  
114 atmospheric water on the surface of the aluminium foils, a conditioning unit was mounted  
115 between the impactor inlet and the sampling unit consisting of a 3 m tube. By heating the  
116 sampled air, high relative humidity of the ambient air was reduced to 75-80% before the  
117 collection of the aerosol particles. The temperature difference between the ambient air at the  
118 impactor inlet and the sampled air after the conditioning unit was below 9 K. Sampling time  
119 was typically 24 h. After sampling, filters and aluminium foils were stored in aluminum boxes  
120 at -20 °C and transported in dry ice to the TROPOS laboratories in Leipzig, Germany. The  
121 chemical analysis of inorganic ions, the water soluble organic carbon (in the aerosol particles  
122 as well as in the ocean water and cloud water) and elemental carbon are described in detail in  
123 (van Pinxteren, et al. 2017; van Pinxteren, et al. 2015) and in Triesch, et al. (2019).  
124

### 125 **Ice nucleating particles: sampling and analysis**

126 The quartz fiber filters mentioned in the previous paragraph (PM<sub>10</sub>, PM<sub>1</sub> at CVAO and Mt.  
127 Verde) were used for INP measurements. INP concentrations were also analysed for bulk  
128 seawater and SML seawater collected at the seawater station Bahia das Gatas and in cloud water  
129 collected during cloud events on the mountain top (Mt. Verde). All of the filter and water  
130 samples were stored at -20 °C at Cape Verde and cooled below -20 °C during transportation to  
131 TROPOS, where all samples were again stored at -20 °C until they were prepared for the  
132 measurements. Two droplet freezing devices called LINA (Leipzig Ice Nucleation Array) and  
133 INDA (Ice Nucleation Droplet Array) (Chen, et al. 2018; Hartmann, et al. 2019) were deployed  
134 to characterize INP number concentrations (N<sub>INP</sub>) from filter samples and in bulk and SML  
135 seawater, and cloud water, yielding results in the temperature range from roughly -5°C to -  
136 25°C.  
137

### 138 **SAS analysis**

139 Phase sensitive alternating current (AC) voltammetry was applied for SAS analysis, being  
140 already used as a successful tool for the determination of SAS in a plethora of environmental  
141 aquatic samples (Frka, et al. 2009; Frka, et al. 2012; Kroflić, et al. 2018). Measurements (out-  
142 of-phase mode, frequency 77 Hz, and amplitude 10 mV) were performed with µAutolab-type  
143 II (Eco Chemie B. V., The Netherlands), GPES 4.6 software (Eco Chemie B. V., The  
144 Netherlands), followed the method of Ćosović and Vojvodić (1998). A standard polarographic  
145 Metrohm cell of 50 cm<sup>3</sup> with a three-electrode system was used: working electrode - hanging  
146 mercury drop electrode (HMDE; Metrohm, Switzerland; A = 0.01245 cm<sup>2</sup>), reference electrode  
147 - Ag/AgCl/3 mol L<sup>-1</sup> KCl, auxiliary electrode - platinum coil. Before each measurement,  
148 previously purified (450 °C for 5 h; charcoal organic residue removal) saturated NaCl (Kemika,  
149 Croatia) solution was added to the sample to adjust the electrolyte concentration to 0.55 mol  
150 L<sup>-1</sup>.

151

### 152 **Lipid analysis: seawater**

153 Total lipid and lipid class quantitation was performed by Iatroscan thin layer chromatography–  
154 flame ionization detection (TLC–FID) (Iatroscan MK-VI, Iatron, Japan). Lipids were separated  
155 on Chromarods-SIII and quantified by an external calibration with a standard lipid mixture.  
156 Quantified lipid classes include hydrocarbons (HC), lipid degradation indices (DI) (fatty acid  
157 methyl esters (ME), free fatty acids (FFA), alcohols (ALC), 1,3-diacylglycerols (1,3DG), 1,2-  
158 diacylglycerols (1,2DG) and monoacylglycerols (MG)), wax esters (WE), phytoplankton  
159 energy reserves (triacylglycerols (TG)), membrane lipids including three phospholipids (PL)  
160 (phosphatidylglycerols (PG), phosphatidylethanolamines (PE) and phosphatidylcholines (PC)),  
161 glycolipids (GL) (sulfoquinovosyldiacylglycerols (SQDG), monogalactosyldiacylglycerols  
162 (MGDG) and digalactosyldiacylglycerols (DGDG)), sterols (ST) and pigments (PIG). Lipids  
163 indicating OM degradation (DegLip) comprise the sum of ME, FFA, ALC, DG, MG. The  
164 standard deviation accounted for 3 to 11% of the signal magnitude of lipid classes (Gašparović,  
165 et al. 2015; Gašparović, et al. 2017).

166

### 167 **Lipid biomarker and isotope analysis: aerosol particles**

168 Typically one half of the filter was used for the lipid analysis. The lipids were extracted with a  
169 3:1 DCM mixture (4 times 40 ml) and the combined extracts were evaporated to a volume of 1  
170 ml. The concentrated extract was dried with NaSO<sub>4</sub> and subsequently saponified with  
171 KOH/MeOH (50 g L<sup>-1</sup>, 1h, 80°C) and then evaporated to dryness. Afterwards the extract was  
172 fractionated over an aminopropyl-column into four fractions of different polarity following  
173 standard geochemical procedures (Hinrichs, et al. 2000). The fatty acids were converted to their  
174 respective methylester using a BF<sub>3</sub>/MeOH reagent and the alcohols were silylated with BSTFA  
175 in the presence of pyridine. Each fraction was dried under nitrogen and picked up in a small  
176 amount of hexane for the following analysis. Quantification was carried out with GC-FID and  
177 GC-MS was used for identification. Compound specific carbon isotope analysis was done by  
178 GC-C-IRMS.

179

### 180 **Trace metal analysis**

181 Size resolved aerosol particles were collected on polycarbonate foils (Wicom, Heppenheim,  
182 Germany) using a low-pressure Berner impactor with a PM10 isokinetic inlet at a flow rate of  
183 75 l min<sup>-1</sup>. The collected particles were impacted on the foils creating spots of compressed  
184 particles. The impacted spots were analyzed for their trace metal content using a Total  
185 Reflection X-Ray Fluorescence (TXRF) S2 PICOFOX (Bruker AXS, Berlin, Germany)  
186 spectrometer equipped with a Molybdenum X-ray source. Trace metals including Fe, Mn, Ca,  
187 Cu, Zn, Se, V, Cr, Pb, Ni, Ti, Rb, Sr, Ba, La, and Ce were analyzed with a detection limit of a  
188 few picograms. The sample preparation procedure and instrument specifications are described  
189 in detailed in Fomba, et al. (2013). Trace metals were used to identify days of mineral dust  
190 influence and its estimation.

191

### 192 **Pigments and Chlorophyll-*a***

193 For pigment analysis, several liters of bulk water were collected in a water depth of  
194 approximately 30 cm by filling 5 L polypropylene bottles. The bulk water was filtered over GF-  
195 F filters (Whatman, Germany) and the filters were immediately frozen at -20 °C until analysis.  
196 For analysis, the GF-F filters were extracted in 5 mL ethanol, and 20 µL of the extract were

197 injected into the HPLC (Dionex, Sunnyvale, CA, USA) under gradient elution using  
198 methanol/acetonitrile/water systems as eluents. Chlorophyll a, chlorophyll b, phaeophorbide a,  
199 phaeophorbide b as well as chlorophyllide a were detected with fluorescence detection (FLD)  
200 as described in van Pinxteren, et al. (2017). All other pigments were analyzed with a diode array  
201 detector (DAD). Standard components were used for peak assignment and external calibration.

202

### 203 **DOM classes**

204 SML, bulk and cloud samples and aqueous aerosol extracts for DOM classes were filtered  
205 through 0.45  $\mu\text{m}$  Polyethersulfone (PES) syringe filters and stored chilled (0 to 4  $^{\circ}\text{C}$ ) in pre-  
206 combusted glass “TOC” vials until analysis, which occurred within 2 days of sample  
207 preparation. LC-OCD-OND (Liquid chromatography with organic carbon detection and  
208 organic nitrogen detection), allows  $\sim 1\text{ml}$  of whole water to be injected onto a size exclusion  
209 column (SEC; 2  $\text{ml min}^{-1}$ ; HW50S, Tosoh, Japan) with a phosphate buffer (potassium  
210 dihydrogen phosphate 1.2  $\text{g L}^{-1}$  plus 2  $\text{g L}^{-1}$  di-sodium hydrogen phosphate x 2  $\text{H}_2\text{O}$ , pH 6.58)  
211 and separated into five “compound-group specific” DOM fractions. The resulting fractions are  
212 identified using unique detectors for organic carbon, UV-amenable carbon and organic nitrogen  
213 Huber, et al. (2011). All peaks were identified and quantified with bespoke software (Labview,  
214 2013) normalized to International Humic Substances Society humic and fulvic acid standards,  
215 potassium hydrogenphthalate and potassium nitrate. Cloud water and aerosol samples were  
216 blank corrected based on sample blanks that were extracted in the same way. No sample blanks  
217 were available for SML and bulk water samples.

218

### 219 **TEP**

220 Water samples (SML, cloud and bulk water) are then filtered onto 0.2 $\mu\text{m}$  polycarbonate filters  
221 at low pressure and stained with alcian blue. We used the spectrophotometric method to  
222 analyse the stain (Passow and Alldredge 1995) which gives TEP in  $\mu\text{g}$  of xanthum gum  
223 equivalent ( $\mu\text{gXeqL}^{-1}$ ).

224

### 225 **Microbial cell counts**

226 Prokaryotic cell numbers were counted via flow cytometry after water samples were fixed,  
227 flash-frozen in liquid nitrogen, and stored at  $-20^{\circ}\text{C}$ . Prior measurements, all samples were  
228 stained with SYBR Green solution. Counting was performed after addition of latex beads  
229 serving as an internal standard. Further details can be found in Robinson, et al. (2019).

230 Small autotrophic cells were counted after addition of red fluorescent latex beads (Polysciences,  
231 Eppelheim, Germany) and were detected by their signature in a plot of red (FL3) vs. orange  
232 (FL2) fluorescence, and red fluorescence vs. side scatter (SSC). This approach allows  
233 discrimination between different groups of prokaryotic and eukaryotic autotrophs (Marie, et al.  
234 2010) which in our case were size classes defined as *Synechococcus*-like cells and  
235 Nanoeukaryotes.

236

### 237 **Nitrous acid (HONO) using a LOnG Path Absorption Photometer (LOPAP)**

238 Nitrous acid (HONO) was continuously measured using a commercialized LOPAP HONO  
239 analyzer (LOnG Path Absorption Photometer, QUMA Elektronik & Analytik GmbH), which  
240 has been described in more details elsewhere. The instrument was placed in a ventilated  
241 aluminum box. The temperature of the stripping coil was held at  $25^{\circ}\text{C}$  using a thermostat.



242 HONO was collected into a stripping coil and immediately converted in azodye. HONO  
243 concentration is indirectly measured through the azodye absorption from 550 to 610 nm into  
244 long path optical cell (2 meters). Temporal resolution of HONO was fixed to 30 seconds.  
245 Sampling flow of the gas was  $1 \text{ L min}^{-1}$ . The uncertainty of HONO concentration was 10%  
246 ( $2\sigma$ ) with a detection limit of few ppt under our measurement condition. HONO concentration  
247 was calibrated using a standard solution of  $\text{NO}_2^-$  (Titritisol Nitrite standard,  $1000 \text{ mg L}^{-1} \text{ NO}_2^-$   
248 in water). The instrument was frequently calibrated over the measurement period. To account  
249 for zero drift, automatic zero air measurements were operated for 1 hour every 6.5 hours.

250

### 251 **GO: PAM**

252 The photochemical setup consisted of a Quartz cell (2 cm diameter and 5 cm length) half filled  
253 with SML samples collected the previous day and irradiated by means of a Xenon lamp. This  
254 reactor was flushed by a flow of air containing a large concentration of ozone (ppm levels),  
255 triggering  $\text{O}_3/\text{OH}$  reactions at the surface, but also in the bulk of the SML samples. The gaseous  
256 products of these reactions were then injected into the Go:PAM where aerosol production could  
257 take place.

258

### 259 **Characterization of cloud events at the Mt. Verde**

260 Cloud events were frequently observed at MT. Verde and characterized by relative humidity  
261 (RH) values of 100 %. In addition, cloud events were verified from the PNSD as described in  
262 Gong, et al. (2020).

263

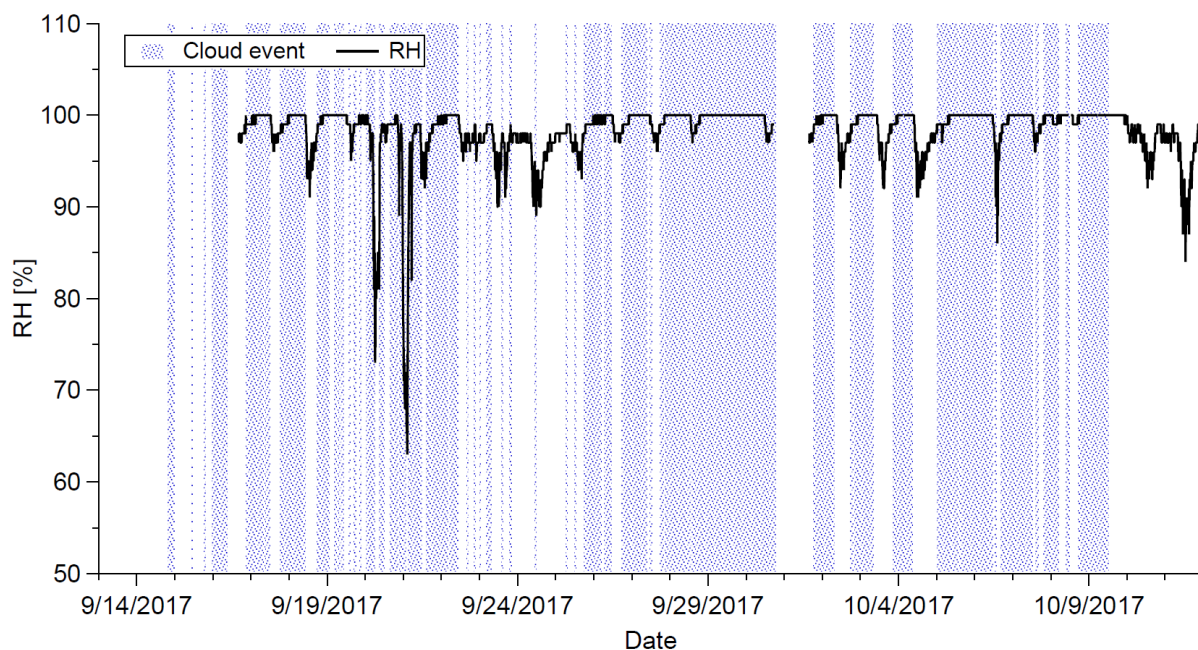

264

265 Fig. S4: Time series of RH at Mt. Verde illustrated by the black line. Cloud event times are  
266 indicated by the blue shadows. The method and the figure are closely adopted from Gong, et  
267 al. 2020.

268

### 269 **Simulations I**

270 The meteorological model data by COSMO are used to define a vertical meteorological data  
271 field as radio sounding data provided from the meteorological station Sal (Station number:

272 8594) are missing during the campaign. These data are used for meteorological 2D-simulations  
273 with COSMO-MUSCAT (Wolke, et al. 2012) that is done to calculate if a cloud will also occur  
274 over a flat surface area as from the 3D-simulations the effect of topography cannot be  
275 completely ruled out. Therefore, the meteorological model data by the Consortium for Small-  
276 scale Modeling-Multiscale Chemistry Aerosol Transport Model (COSMO), (Baldauf, et al.  
277 2011) were used to define a vertical meteorological data field. For analyzing important  
278 multiphase chemical pathways, and the impact of the horizontal and vertical transport on the  
279 aerosol and cloud droplet composition within the MBL, the first model approach will be a box  
280 modeling study with the air parcel model SPACCIM (Spectral Aerosol Cloud Chemistry  
281 Model, Wolke, et al. 2005). SPACCIM is designed to investigate complex atmospheric  
282 multiphase chemistry processes. It has proven its excellent capability to investigate important  
283 multiphase chemical pathways (Hoffmann, et al. 2016; Hoffmann, et al. 2019; Tilgner and  
284 Herrmann 2010) Therefore, the simulations enable the determination of the most relevant  
285 multiphase chemical pathways for the chemical processing of marine aerosols during the  
286 campaign. The second model approach will apply 2D-simulations of the marine multiphase  
287 chemistry with the chemical transport model COSMO-MUSCAT (Baldauf, et al. 2011), which  
288 numerical scheme is able to treat cloud droplet chemistry (Schrödner, et al. 2014). Hence, the  
289 COSMO-MUSCAT simulations are able to investigate (i) the impact of horizontal and vertical  
290 transport on the chemical aerosol as well as cloud droplet composition and (ii) the direct and  
291 indirect impact of clouds on multiphase chemistry within, above and below the cloud. At the  
292 end of the simulations the model results will be compared with the measured aerosol  
293 concentration and composition and the in-cloud measurements at top of the Monte Verde  
294 mountain. For this purpose, a novel reduced marine multiphase chemistry module will be  
295 applied.

## 296 **Simulations II**

297 The simulations for the marine boundary layer height were carried out on three domains centred  
298 on Sao Vicente, Cape Verde, applying one-way offline nesting. The outer domain “N0” has a  
299 horizontal resolution of around 14 km and the two inner nests “N1” and “N2” have a grid  
300 spacing of 3.5 km and 0.875 km, respectively (see Fig. S5). The results shown in this work only  
301 refer to the inner nest “N2”.

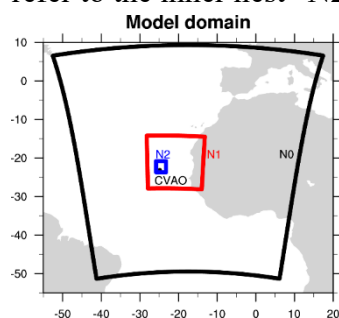

302  
303  
304 *Fig. S5: Model domains of COSMO-MUSCAT simulations performed within the MarParCloud*  
305 *project and geographical location of the Cape Verde Atmospheric Observatory (CVAO) at Sao*  
306 *Vicente, Cape Verde. Nested 14 km (black line), 3.5 km (red line), and 0.875 km (blue line).*

307  
308

309 Table S1: Instruments employed at the CVAO during the campaign.

310

| Measured parameter                                                                                                                                           | Instrument                                                                                       | Performance                           | No. of measurements /samples (incl. blanks)                                                                                    | Running period                                  | Responsible Institution      |
|--------------------------------------------------------------------------------------------------------------------------------------------------------------|--------------------------------------------------------------------------------------------------|---------------------------------------|--------------------------------------------------------------------------------------------------------------------------------|-------------------------------------------------|------------------------------|
| Chemical and biological composition of aerosol particles (PM <sub>1</sub> , PM <sub>10</sub> , TSP <sub>h.v.</sub> , TSP <sub>l.v.</sub> ), INP measurements | Digitel sampler. 5-stage Berner impactor. High volume (h.v.) sampler. Low Volume (l.v.) samplers | 8h to 48 h sampling                   | PM <sub>1</sub> : 30<br>PM <sub>10</sub> : 30<br>TSP <sub>h.v.</sub> : 12<br>TSP <sub>l.v.</sub> : 23<br>Impactor: 18x5 stages | 15 <sup>th</sup> Sept – 11 <sup>th</sup> Oct    | TROPOS. Leipzig, Germany     |
| Physical characterization of aerosol size distribution                                                                                                       | MPSS, APS, PNSD, CCNC                                                                            | 15 min sampling                       |                                                                                                                                | 13 <sup>th</sup> Sep – 13 <sup>th</sup> October | TROPOS. Leipzig              |
| Meteorology                                                                                                                                                  | Automatic weather station                                                                        | Minute samples                        |                                                                                                                                | Continuous                                      | NCAS. University of York. UK |
| VOCs, OVOCs,                                                                                                                                                 | Dual channel, gas chromatograph with flame ionization detection                                  | Hourly samples                        |                                                                                                                                | 15 <sup>th</sup> Sep – 8 <sup>th</sup> October  | NCAS. University of York. UK |
| Ozone                                                                                                                                                        | UV absorption                                                                                    | Minute samples                        |                                                                                                                                | Continuous                                      | NCAS. University of York. UK |
| Vertical profiles of meteorological parameters                                                                                                               | Helikite                                                                                         | 10 days of measurements               | 19 profiles                                                                                                                    | 13 <sup>th</sup> Sep – 13 <sup>th</sup> October | TROPOS. Leipzig              |
| SML and aerosol particles                                                                                                                                    | Plunging waterfall tank                                                                          | 9 days of measurements                | 5 x SML and bulk water, 2 x 7 TSP samples                                                                                      | 2 <sup>nd</sup> Oct – 10 <sup>th</sup> Oct      | ZMT, Bremen, Germany         |
| HONO                                                                                                                                                         | LoPAP                                                                                            | Continuously                          |                                                                                                                                | 15 <sup>th</sup> Sept – 11 <sup>th</sup> Oct    | ICARE, Orleans, France       |
| SOA forming potential                                                                                                                                        | Go:PAM                                                                                           | Continuously for ambient air sampling | 3 SML samples                                                                                                                  | 15 <sup>th</sup> Sept – 11 <sup>th</sup> Oct    | IRCELYON, Lyon, France.      |

311

312

313

314

315

316

317

318 Table S2: Instruments employed at the Mt. Verde during the campaign.

| Measured parameter                                                                                                                                           | Instrument                                                          | Performance         | No. of measurements /samples (incl. blanks) during campaign                                      | Running period                                  | Responsible Institution |
|--------------------------------------------------------------------------------------------------------------------------------------------------------------|---------------------------------------------------------------------|---------------------|--------------------------------------------------------------------------------------------------|-------------------------------------------------|-------------------------|
| Chemical and biological composition of aerosol particles (PM <sub>1</sub> , PM <sub>10</sub> , TSP <sub>h.v.</sub> , TSP <sub>l.v.</sub> ), INP measurements | Digitel sampler. 5-stage Berner impactor. Low Volume (l.v.) sampler | 8h to 48 h sampling | PM <sub>1</sub> : 19<br>PM <sub>10</sub> : 19<br>TSP <sub>l.v.</sub> : 3<br>Impactor: 7x5 stages | 21 <sup>th</sup> Sept – 09 <sup>th</sup> Oct    | TROPOS. Leipzig         |
| Physical characterization of aerosol size distribution                                                                                                       | MPSS, APS, PNSD, CCNC                                               | 15 min sampling     |                                                                                                  | 13 <sup>th</sup> Sep – 13 <sup>th</sup> October | TROPOS. Leipzig         |
| Meteorology                                                                                                                                                  | Automatic weather station (Davis)                                   | 5 min sampling      |                                                                                                  | Continuous                                      | TROPOS. Leipzig         |
| Cloud water for chemical, biological and INP measurements                                                                                                    | Cloud water sampler (six samplers run in parallel)                  | 2.5 – 13 h sampling | 155                                                                                              | 20 <sup>th</sup> Sept – 09 <sup>th</sup> Oct    | TROPOS. Leipzig         |

319

320

321

322

323

324

325

326

327

328

329

330

331

332 Table S3: Details on bulk water and SML sampling at Bahia das Gatas at N16°53. W24°54.

333

| Sampling date | Local sampling time (UTC-1) | Exact coordinates              | Sampling device | Sampling conditions                       | Bulk water                |            |                  | SML                       |            |                  | Sample ID      |
|---------------|-----------------------------|--------------------------------|-----------------|-------------------------------------------|---------------------------|------------|------------------|---------------------------|------------|------------------|----------------|
|               |                             |                                |                 |                                           | salinity [ppt equals psU] | pH - value | temperature [°C] | salinity [ppt equals psU] | pH - value | temperature [°C] |                |
| 18.09.2017    | 11:35 -12:00                | No data                        | GP*             | very windy, big waves                     | 34.1                      | 8.1        | 25.0             | -                         | -          | -                | Seawater 1     |
| 19.09.2017    | 8:38 -9:05                  | No data                        | GP              | not reported                              | 36.1                      | 8.2        | 25.2             | -                         | -          | -                | Seawater 2     |
| 20.09.2017    | 8:32 -9:54                  | N16°53.341<br>W24°54.360       | GP              | Slick and foam at the end of the sampling | 36.3                      | 8.1        | 26.7             | 36.2                      | 8.1        | 26.7             | Seawater 3     |
| 22.09.2017    | 8:56 -9:20                  | N16°53'48.002<br>W24°54'13.858 | GP              | very windy with big waves                 | -                         | -          | -                | -                         | -          | -                | Seawater 4     |
| 25.09.2017    | 9:45 -10:48                 | N16°53.753<br>W24°54.117       | GP              | calm sea                                  | 36.4                      | 8.2        | 26.0             | 36.4                      | 8.1        | 25.5             | Seawater 5     |
| 26.09.2017    | 10:05-10:51                 | N16°53.934<br>W24.54.556       | GP              | not reported                              | 36.3                      | 8.2        | 25.1             | 36.1                      | 8.1        | 26.4             | Seawater 6     |
| 26.09.2017    | 11:10-11:50                 | N16°53.742<br>W24°54.061       | CAT**           | not reported                              | 36.2                      | 8.0        | 26.1             | 36.4                      | 8.0        | 26.1             | Seawater 6 (2) |

|                |             |                                |     |                                      |      |      |      |      |     |      |                 |
|----------------|-------------|--------------------------------|-----|--------------------------------------|------|------|------|------|-----|------|-----------------|
| 27.09.2<br>017 | 8:50 -10:03 | N16°53.748<br>W24°54.134       | GP  | not reported                         | 36.4 | 8.1  | 24.0 | 36.3 | 8.1 | 23.7 | Seawater 7      |
| 27.09.2<br>017 | 8:50 -10:03 | N16°53.623<br>W24°54.257       | CAT | not reported                         | 36.2 | 7.9  | 27.0 | 36.0 | 7.9 | 26.7 | Seawater 7 (2)  |
| 28.09.2<br>017 | 9:15 -10:05 | N16°53.623<br>W24°54.257       | GP  | not reported                         | 36.5 | 8.1  | 27.8 | 36.6 | 8.1 | 26.8 | Seawater 8      |
| 28.09.2<br>017 | 9:15 -10:05 | N16°53.623<br>W24°54.257       | CAT | not reported                         | 36.3 | 8.1  | 27.1 | 36.0 | 8.1 | 27.8 | Seawater 8 (2)  |
| 02.10.2<br>017 | 8:30 - 9:30 | No data                        | GP  | very windy, drift during<br>sampling | 36.0 | 8.2  | 20.9 | 36.5 | 8.3 | 20.9 | Seawater 9      |
| 02.10.2<br>017 | 8:30 -9:30  | No data                        | GP  | very windy, drift during<br>sampling | 35.9 | 8.2  | 22.7 | 36.1 | 8.1 | 23.9 | Seawater 9 (2)  |
| 03.10.2<br>017 | 8:15 - 9:35 | N16°53.341<br>W24°54.360       | GP  | Not reported                         | 36.1 | 8.2  | 22.8 | 36.6 | 8.2 | 21.0 | Seawater 10     |
| 03.10.2<br>017 | 8:15 - 9:35 | N16°53.341<br>W24°54.360       | CAT | not reported                         | 36.2 | 8.2  | 23.5 | 36.3 | 8.2 | 22.4 | Seawater 10 (2) |
| 04.10.2<br>017 | 8:15 - 9:00 | N16°53'48.002<br>W24°54'13.858 | GP  | not reported                         | 36.2 | 8.23 | 23.7 | -    | -   | -    | Seawater 11     |
| 04.10.2<br>017 | 8:15 - 9:55 | N16°53.934<br>W24.54.556       | CAT | not reported                         | 36.3 | 8.2  | 22.8 | -    | -   | -    | Seawater 11 (2) |

|                |                  |                               |           |                                                   |      |     |      |      |     |      |                 |
|----------------|------------------|-------------------------------|-----------|---------------------------------------------------|------|-----|------|------|-----|------|-----------------|
| 05.10.2<br>017 | 9:24 - 9:41      | N16°53'44.824<br>W24°54'7.021 | GP        | smaller and higher waves<br>in change             | 36.5 | 8.2 | 22.9 | -    | -   | -    | Seawater 12     |
| 06.10.2<br>017 | 08:04-<br>09:47  | N16°53.753<br>W24°54.117      | GP        | windy                                             | 36.3 | 8.2 | 23.7 | 36.6 | 8.2 | 20.7 | Seawater 13     |
| 07.10.2<br>017 | 09:22 -<br>10:35 | N16°53.742<br>W24°54.061      | GP        | very windy with long and<br>short waves in change | 36.4 | 8.2 | 21.8 | 36.7 | 8.2 | 21.2 | Seawater 14     |
| 07.10.2<br>017 | 9:17 - 10:46     | N16°53.742<br>W24°54.061      | GP<br>CAT | very windy with long and<br>short waves in change | 36.5 | 8.2 | 22.4 | 36.7 | 8.2 | 24.5 | Seawater 14 (2) |
| 09.10.2<br>017 | 8:30 - 9:17      | N16°53.623<br>W24°54.257      | GP        | windy                                             | 36.4 | 8.1 | 23.6 | 36.6 | 8.2 | 21.5 | Seawater 15     |
| 10.10.2<br>017 | 8:30 - 9:30      | N16°53.623<br>W24°54.257      | GP        | windy up to very windy<br>with long waves         | 36.3 | 8.2 | 22.4 | 36.4 | 8.2 | 21.7 | Seawater 16     |

334

335

336 \*GP = glass plate, \*\*cat = catamaran

337

338 Table S4: Concentrations of pigments, DOC and microbial parameters in the SML and bulk water samples.

339

| Sampling date                 | 18.09.<br>2017     | 19.09.<br>2017 | 20.09.<br>2017  | 22.09.<br>2017  | 25.09.<br>2017  | 26.09.<br>2017  | 27.09.<br>2017   | 28.09.<br>2017  | 02.10.<br>2017  | 03.10.<br>2017   | 04.10.<br>2017   | 05.10.<br>2017   | 06.10.<br>2017   | 07.10.<br>2017   | 09.10.<br>2017   | 10.10.<br>2017   |       |
|-------------------------------|--------------------|----------------|-----------------|-----------------|-----------------|-----------------|------------------|-----------------|-----------------|------------------|------------------|------------------|------------------|------------------|------------------|------------------|-------|
| Sample ID                     | Sea-water<br>1     | Sea-water<br>2 | Sea-<br>water 3 | Sea-<br>water 4 | Sea-<br>water 5 | Sea-<br>water 6 | Sea-<br>-water 7 | Sea-<br>water 8 | Sea-<br>water 9 | Sea-<br>water 10 | Sea-<br>water 11 | Sea-<br>water 12 | Sea-<br>water 13 | Sea-<br>water 14 | Sea-<br>water 15 | Sea-<br>water 16 |       |
| Parameter                     | unit               |                |                 |                 |                 |                 |                  |                 |                 |                  |                  |                  |                  |                  |                  |                  |       |
| <b><i>pigments</i></b>        |                    |                |                 |                 |                 |                 |                  |                 |                 |                  |                  |                  |                  |                  |                  |                  |       |
| chlorophyll c <sub>2</sub>    | µg L <sup>-1</sup> | 0.016          | -               | 0.026           | -               | 0.031           | -                | 0.041           | 0.023           | 0.029            | 0.028            | -                | 0.025            | -                | 0.039            | 0.039            | 0.062 |
| 19 butanoyl<br>oxyfucoxanthin | µg L <sup>-1</sup> | 0.000          | -               | 0.017           | -               | 0.002           | -                | 0.018           | 0.004           | 0.019            | 0.012            | -                | 0.013            | -                | 0.026            | 0.031            | 0.058 |
| hexanoyloxyfuco<br>xanthin    | µg L <sup>-1</sup> | 0.015          | -               | 0.044           | -               | 0.018           | -                | 0.045           | 0.027           | 0.045            | 0.033            | -                | 0.031            | -                | 0.062            | 0.069            | 0.110 |
| chlorophyll b                 | µg L <sup>-1</sup> | 0.021          | -               | 0.042           | -               | 0.055           | -                | 0.038           | 0.032           | 0.050            | 0.061            | -                | 0.035            | -                | 0.063            | 0.065            | 0.109 |
| chlorophyll a                 | µg L <sup>-1</sup> | 0.112          | -               | 0.216           | -               | 0.323           | -                | 0.335           | 0.184           | 0.264            | 0.298            | -                | 0.192            | -                | 0.346            | 0.437            | 0.604 |
| fucoxanthin                   | µg L <sup>-1</sup> | 0.014          | -               | 0.044           | -               | 0.093           | -                | 0.171           | 0.040           | 0.045            | 0.060            | -                | 0.037            | -                | 0.105            | 0.153            | 0.223 |
| phaeophorbide a               | µg L <sup>-1</sup> | 0.031          | -               | 0.032           | -               | 0.047           | -                | 0.041           | 0.037           | 0.034            | 0.036            | -                | 0.033            | -                | 0.037            | 0.039            | 0.038 |
| phaeophytin a                 | µg L <sup>-1</sup> | 0.017          | -               | 0.018           | -               | 0.027           | -                | 0.023           | 0.023           | 0.026            | 0.029            | -                | 0.020            | -                | 0.025            | 0.026            | 0.027 |
| chlorophyllide a              | µg L <sup>-1</sup> | 0.000          | -               | 0.010           | -               | 0.010           | -                | 0.010           | 0.000           | 0.000            | 0.010            | -                | 0.000            | -                | 0.010            | 0.010            | 0.000 |
| violaxanthin                  | µg L <sup>-1</sup> | 0.000          | -               | 0.003           | -               | 0.005           | -                | 0.003           | 0.003           | 0.004            | 0.006            | -                | 0.003            | -                | 0.005            | 0.006            | 0.007 |
| diadinoxanthin                | µg L <sup>-1</sup> | 0.009          | -               | 0.018           | -               | 0.016           | -                | 0.021           | 0.014           | 0.017            | 0.017            | -                | 0.013            | -                | 0.023            | 0.030            | 0.034 |
| lutein                        | µg L <sup>-1</sup> | 0.001          | -               | 0.002           | -               | 0.005           | -                | 0.003           | 0.002           | 0.003            | 0.003            | -                | 0.002            | -                | 0.003            | 0.003            |       |
| chlorophyll c <sub>3</sub>    | µg L <sup>-1</sup> | 0.014          | -               | 0.022           | -               | 0.027           | -                | 0.038           | 0.017           | 0.025            | 0.025            | -                | 0.022            | -                | 0.035            | 0.034            | 0.059 |
| peridinin                     | µg L <sup>-1</sup> | 0.003          | -               | 0.005           | -               | 0.007           | -                | 0.006           | 0.003           | 0.007            | 0.005            | -                | 0.006            | -                | 0.005            | 0.005            | 0.008 |
| zeaxanthin                    | µg L <sup>-1</sup> | 0.108          | -               | 0.106           | -               | 0.134           | -                | 0.089           | 0.136           | 0.141            | 0.206            | -                | 0.165            | -                | 0.185            | 0.148            | 0.129 |
| β-carotene                    | µg L <sup>-1</sup> | 0.006          | -               | 0.009           | -               | 0.017           | -                | 0.011           | 0.010           | 0.013            | 0.018            | -                | 0.010            | -                | 0.014            | 0.015            | 0.015 |
| <b><i>DOC</i></b>             |                    |                |                 |                 |                 |                 |                  |                 |                 |                  |                  |                  |                  |                  |                  |                  |       |
| DOC SML<br>(GP*)              | µg L <sup>-1</sup> | 3260           | 2240            | 2780            | 2580            | 1680            | 2390             | 2020            | 2270            | 2020             | 2190             | 2050             | -                | 3330             | 1610             | 1940             | 1820  |
| DOC SML<br>(cat**)            | µg L <sup>-1</sup> | -              | -               | -               | -               | -               | 2040             | 1450            | 1940            | 1520             | 1520             | -                | -                | -                | 1850             | -                | -     |
| DOC bulk water<br>(GP)        | µg L <sup>-1</sup> | 2800           | 1480            | 1090            | 1419            | 2370            | 1640             | 1070            | 1370            | 1340             | 1370             | 1090             | 1140             | 1290             | 947              | 1160             | 1290  |



|                             |                        |   |   |          |   |          |          |          |          |          |          |          |          |          |      |   |   |
|-----------------------------|------------------------|---|---|----------|---|----------|----------|----------|----------|----------|----------|----------|----------|----------|------|---|---|
| DOC bulk water (cat)        | $\mu\text{g L}^{-1}$   | - | - | -        | - | -        | 1810     | 1160     | 1280     | 1260     | 1260     | 1840     | -        | -        | 1480 | - | - |
| <b>microbial parameters</b> |                        |   |   |          |   |          |          |          |          |          |          |          |          |          |      |   |   |
| LNA (SML)                   | cells $\text{mL}^{-1}$ | - | - | 1.06E+06 | - | 1.48E+06 | 9.34E+05 | 1.05E+06 | 1.20E+06 | 9.90E+05 | 1.30E+06 | 1.15E+06 | -        | 1.06E+06 | -    | - | - |
| HNA (SML)                   | cells $\text{mL}^{-1}$ | - | - | 8.91E+04 | - | 1.62E+05 | 5.85E+04 | 1.03E+05 | 1.23E+05 | 1.40E+05 | 7.84E+04 | 7.04E+04 | -        | 9.58E+04 | -    | - | - |
| TCN (SML)                   | cells $\text{mL}^{-1}$ | - | - | 1.15E+06 | - | 1.64E+06 | 9.92E+05 | 1.15E+06 | 1.33E+06 | 1.13E+06 | 1.38E+06 | 1.22E+06 | -        | 1.16E+06 | -    | - | - |
| synechococcus (SML)         | cells $\text{mL}^{-1}$ | - | - | 4.42E+04 | - | 6.70E+04 | 2.71E+04 | 2.63E+04 | 2.61E+04 | 3.41E+04 | 7.40E+04 | 4.53E+04 | -        | 2.42E+04 | -    | - | - |
| nanoecaryotes (SML)         | cells $\text{mL}^{-1}$ | - | - | 6.76E+02 | - | 1.64E+02 | 5.16E+01 | 5.16E+01 | 5.16E+01 | 1.85E+02 | 1.02E+01 | 2.05E+01 | -        | -        | -    | - | - |
| LNA (bulk water)            | cells $\text{mL}^{-1}$ | - | - | 9.70E+05 | - | 1.24E+06 | 1.06E+06 | 1.07E+06 | 1.05E+06 | 1.72E+06 | 1.32E+06 | 1.21E+06 | 1.24E+06 | 1.18E+06 | -    | - | - |
| HNA (bulk water)            | cells $\text{mL}^{-1}$ | - | - | 7.19E+04 | - | 1.17E+05 | 7.49E+04 | 9.15E+04 | 8.66E+04 | 6.07E+05 | 1.44E+05 | 7.91E+04 | 9.31E+04 | 9.88E+04 | -    | - | - |
| TCN (bulk water)            | cells $\text{mL}^{-1}$ | - | - | 1.04E+06 | - | 1.36E+06 | 1.13E+06 | 1.16E+06 | 1.14E+06 | 2.32E+06 | 1.46E+06 | 1.28E+06 | 1.34E+06 | 1.28E+06 | -    | - | - |
| synechococcus (bulk water)  | cells $\text{mL}^{-1}$ | - | - | 2.45E+04 | - | 4.27E+04 | 2.05E+04 | 2.63E+04 | 1.99E+04 | 6.82E+04 | 5.31E+04 | 3.79E+04 | 2.96E+04 | 2.42E+04 | -    | - | - |
| nanoecaryotes (bulk water)  | cells $\text{mL}^{-1}$ | - | - | 5.16E+01 | - | 1.54E+02 | 6.18E+01 | 1.23E+02 | 1.03E+02 | 1.46E+03 | 1.74E+02 | 6.14E+01 | 6.18E+01 | 1.06E+01 | -    | - | - |

340

341

342

343

344

\*GP: glass plate; \*cat: catamaran (MarParCat)

TCN: total bacterial cell numbers

HNA: high nucleic acid containing cells

LNA : low nucleic acid containing cells

- : no measurements available

345

\*LOD: limit of detection

346

347

348

349

350

351

352 Table S5: Concentrations and standard deviations (ng m<sup>-3</sup>) of size resolved aerosol particle constituents measured in parallel during parallel measurements between  
 353 2.10 and 9.10 obtained from the CVAO (mean value of 5 blocks) and the Mt.Verde (mean value of 6 blocks) station. Aerosol particles were sampled in five different  
 354 size fractions with aerodynamic particle diameter D<sub>P</sub> (50% cut-off) from: 0.05-0.14 μm (stage 1), 0.14-0.42 μm (stage 2), 0.42-1.2μm (stage 3), 1.2-3.5 μm (stage  
 355 4) and 3.5-10 μm (stage 5).  
 356  
 357

| CVAO           | Sodium   | Chloride | MSA     | Sulfate   | Nitrate | Oxalate | Ammonium | Potassium | Magnesium | WSOM    | EC      |
|----------------|----------|----------|---------|-----------|---------|---------|----------|-----------|-----------|---------|---------|
| <b>stage 1</b> | <LOD*    | <LOD*    | 0.5±0.4 | 28.0±12   | <LOD*   | <LOD*   | 12.5±4   | <LOD*     | <LOD*     | 9.4±21  | 6.3±0.9 |
| <b>stage 2</b> | <LOD*    | <LOD*    | 12.7±2  | 741.9±111 | <LOD*   | 3.2±4   | 232±48   | 3.7±5     | 0.3±0.6   | 38.6±16 | 27.5±14 |
| <b>stage 3</b> | 148±27   | 50.1±47  | 6.6±07  | 472.2±26  | 13.7±15 | 0.9±1   | 23.3±10  | 11.4±6    | 16.0±5.3  | 49.1±3  | 14.0±10 |
| <b>stage 4</b> | 1430±375 | 2300±680 | 4.5±0.9 | 572±159   | 698±76  | 22.1±8  | 16.6±4   | 54.4±11   | 156±33    | 108±6   | 12.5±1  |
| <b>stage 5</b> | 1520±306 | 2820±697 | 0.9±0.3 | 503±123   | 536±59  | 2.8±4   | 17.6±5   | 56.9±14   | 181±42    | 91.5±13 | 3.1±4   |
| Mt. Verde      | Sodium   | Chloride | MSA     | Sulfate   | Nitrate | Oxalate | Ammonium | Potassium | Magnesium | WSOM    | EC      |
| <b>stage 1</b> | <LOD*    | <LOD*    | 0.2±0.4 | 7.4±8     | <LOD*   | <LOD*   | 1.4±4    | <LOD*     | <LOD*     | 15.8±18 | 1.8±2   |
| <b>stage 2</b> | <LOD*    | <LOD*    | 2.1±1   | 111±54    | <LOD*   | 0.3±0.4 | 36.5±22  | 0.3±0.7   | <LOD*     | 26.9±21 | 15.0±12 |
| <b>stage 3</b> | 24.9±22  | <LOD*    | 3.7±1   | 254±86    | <LOD*   | 0.4±0.7 | 51.8±20  | 1.3±2.1   | 1.5±2.6   | 44.6±29 | 21.4±11 |
| <b>stage 4</b> | 163±110  | 277±171  | 2.3±0.7 | 156±62    | 96.5±68 | 0.3±0.8 | 12.6±10  | 2.9±5.1   | 13.4±8.5  | 80.2±29 | 3.6±5   |
| <b>stage 5</b> | 143±85   | 256±143  | 2.1±1   | 109±35    | 79.3±46 | <LOD*   | 6.9±7    | 2.6±4.4   | 9.2±11    | 137±56  | 21.0±16 |

358

359 \*LOD: limit of detection

360

361

362

363

364

365

366 Table S6: Average concentrations and standard deviations of DOM fractions in the SML, bulk water and cloud water (ng L<sup>-1</sup>) and in aerosol particles (PM<sub>10</sub>)  
 367 sampled at the CVAO and at the Mt. Verde (ng m<sup>-3</sup>) sampled in parallel within the periods: 26. – 27.09., 01. – 02.10., and 08. – 09.10.2017.  
 368  
 369  
 370

|                                       | N | Biopolymers | Humic<br>Substances | Building<br>Blocks | LMW Neutrals | LMW Acids |
|---------------------------------------|---|-------------|---------------------|--------------------|--------------|-----------|
| <b>SML</b>                            | 3 | 77±27       | 205±11              | 163±21             | 359±84       | 38±31     |
| <b>Bulk water</b>                     | 3 | 67±19       | 234±44              | 137±40             | 362±127      | 2±3       |
| <b>aerosol particles at CVAO</b>      | 3 | <LOD*       | <LOD*               | 114±25             | 84±38        | 2±3       |
| <b>aerosol particles at Mt. Verde</b> | 2 | <LOD*       | <LOD*               | 55±23              | 58±22        | 6±4       |
| <b>Cloud water</b>                    | 4 | 27±21       | 354±222             | 242±224            | 301±227      | 58±98     |

371  
 372 \*LOD: limit of detection  
 373

374  
 375  
 376

377 References:  
378

- 379 Baldauf, M., Seifert, A., Forstner, J., Majewski, D., Raschendorfer, M., and Reinhardt, T.:  
380 Operational Convective-Scale Numerical Weather Prediction with the COSMO Model:  
381 Description and Sensitivities, *Monthly Weather Review*, 139, 3887-3905, 10.1175/mwr-d-10-  
382 05013.1, 2011.
- 383 Chen, J., Wu, Z. J., Augustin-Bauditz, S., Grawe, S., Hartmann, M., Pei, X. Y., Liu, Z. R., Ji,  
384 D. S., and Wex, H. K.: Ice-nucleating particle concentrations unaffected by urban air pollution  
385 in Beijing, China, *Atmospheric Chemistry and Physics*, 18, 3523-3539, 10.5194/acp-18-3523-  
386 2018, 2018.
- 387 Ćosović, B., and Vojvodić, V.: Voltammetric analysis of surface active substances in natural  
388 seawater, *Electroanalysis*, 10, 429-434, 10.1002/(sici)1521-4109(199805)10:6<429::Aid-  
389 elan429>3.3.Co;2-z, 1998.
- 390 Falkowska, L.: Sea surface microlayer: a field evaluation of teflon plate, glass plate and screen  
391 sampling techniques. Part 2. Dissolved and suspended matter, *Oceanologia*, 41, 223-240, 1999.
- 392 Fomba, K. W., Müller, K., van Pinxteren, D., and Herrmann, H.: Aerosol size-resolved trace  
393 metal composition in remote northern tropical Atlantic marine environment: case study Cape  
394 Verde islands, *Atmos. Chem. Phys.*, 13, 4801-4814, 10.5194/acp-13-4801-2013, 2013.
- 395 Frka, S., Kozarac, Z., and Ćosović, B.: Characterization and seasonal variations of surface  
396 active substances in the natural sea surface micro-layers of the coastal Middle Adriatic stations,  
397 *Estuarine Coastal and Shelf Science*, 85, 555-564, 10.1016/j.ecss.2009.09.023, 2009.
- 398 Frka, S., Pogorzelski, S., Kozarac, Z., and Ćosović, B.: Physicochemical Signatures of Natural  
399 Sea Films from Middle Adriatic Stations, *Journal of Physical Chemistry A*, 116, 6552-6559,  
400 10.1021/jp212430a, 2012.
- 401 Gašparović, B., Kazazić, S. P., Cvitešić, A., Penezić, A., and Frka, S.: Improved separation and  
402 analysis of glycolipids by Iatroscan thin-layer chromatography-flame ionization detection,  
403 *Journal of Chromatography A*, 1409, 259-267, 10.1016/j.chroma.2015.07.047, 2015.
- 404 Gašparović, B., Kazazić, S. P., Cvitešić, A., Penezić, A., and Frka, S.: Improved separation and  
405 analysis of glycolipids by Iatroscan thin-layer chromatography-flame ionization detection (vol  
406 1409, pg 259, 2015), *Journal of Chromatography A*, 1521, 168-169,  
407 10.1016/j.chroma.2017.09.038, 2017.
- 408 Gong, X., Wex, H., Voigtländer, J., Fomba, K. W., Weinhold, K., van Pinxteren, M.,  
409 Henning, S., Müller, T., Herrmann, H., and Stratmann, F.: Characterization of aerosol  
410 particles at Cabo Verde close to sea level and at the cloud level – Part 1: Particle number size  
411 distribution, cloud condensation nuclei and their origins , *Atmos. Chem. Phys.*, 20, 1431–  
412 1449, <https://doi.org/10.5194/acp-20-1431-2020>, 2020.  
413
- 414 Hartmann, M., Blunier, T., Brugger, S.O., Schmale, J., Schwikowski, M., Vogel, A., Wex,  
415 H., and Stratmann, F.: Variation of Ice Nucleating Particles in the European Arctic Over the  
416 Last Centuries, *Geophysical Research Letters*, 46: 4007-16, 2019.  
417
- 418 Hinrichs, K. U., Summons, R. E., Orphan, V., Sylva, S. P., and Hayes, J. M.: Molecular and

419 isotopic analysis of anaerobic methane-oxidizing communities in marine sediments, *Organic*  
420 *Geochemistry*, 31: 1685-701, 2000.

421

422 Hoffmann, E. H., Tilgner, A., Schrödner, R., Brauer, P., Wolke, R., and Herrmann, H.: An  
423 advanced modeling study on the impacts and atmospheric implications of multiphase dimethyl  
424 sulfide chemistry, *Proc Natl Acad Sci USA*, 113, 11776-11781, 10.1073/pnas.1606320113,  
425 2016.

426 Hoffmann, E. H., Tilgner, A., Wolke, R., and Herrmann, H.: Enhanced chlorine and bromine  
427 atom activation by hydrolysis of halogen nitrates from marine aerosols at polluted coastal areas,  
428 *Environmental Science & Technology*, 53, 771-778, 10.1021/acs.est.8b05165, 2019.

429 Huber, S. A., Balz, A., Abert, M., and Pronk, W.: Characterisation of aquatic humic and non-  
430 humic matter with size-exclusion chromatography–organic carbon detection–organic nitrogen  
431 detection (LC-OCD-OND), *Water research*, 45, 879-885, 2011.

432 Kroflič, A., Frka, S., Simmel, M., Wex, H., and Grgić, I.: Size-Resolved Surface-Active  
433 Substances of Atmospheric Aerosol: Reconsideration of the Impact on Cloud Droplet  
434 Formation, *Environmental Science & Technology*, 52, 9179-9187, 10.1021/acs.est.8b02381,  
435 2018.

436

437 Marie, D., Shi, X.L., Rigaut-Jalabert, F., and Vaultot, D.: Use of flow cytometric sorting to  
438 better assess the diversity of small photosynthetic eukaryotes in the English Channel, *Fems*  
439 *Microbiology Ecology*, 72: 165-78, 2010.

440

441 Passow, U., and Alldredge, A. L.: A dye-binding assay for the spectrophotometric measurement  
442 of transparent exopolymer particles (TEP), *Limnology and Oceanography*, 40, 1326-1335,  
443 10.4319/lo.1995.40.7.1326, 1995.

444 Robinson, T.-B., Wurl, O., Bahlmann, E., Jürgens, K., and Stolle, C.: 2019 b. 'Rising bubbles  
445 enhance the gelatinous nature of the air–sea interface', *Limnology and Oceanography*,  
446 10.1002/lno.11188, 2019.

447

448 Schrödner, R., Tilgner, A., Wolke, R., and Herrmann, H.: Modeling the multiphase processing  
449 of an urban and a rural air mass with COSMO–MUSCAT, *Urban Climate*, 10, 720-731,  
450 10.1016/j.uclim.2014.02.001, 2014.

451 Tilgner, A., and Herrmann, H.: Radical-driven carbonyl-to-acid conversion and acid  
452 degradation in tropospheric aqueous systems studied by CAPRAM, *Atmos. Environ.*, 44, 5415-  
453 5422, 10.1016/j.atmosenv.2010.07.050, 2010.

454 Triesch, N., van Pinxteren, M., Engel, A., and Herrmann, H.: Concerted measurements of free  
455 amino acids at the Cape Verde Islands: High enrichments in submicron sea spray aerosol  
456 particles and cloud droplets, *Atmos. Chem. Phys. Discuss.*, <https://doi.org/10.5194/acp-2019-976>, in review, 2020

457

458 van Pinxteren, D., Brüeggemann, E., Gnauk, T., Mueller, K., Thiel, C., and Herrmann, H.: A  
459 GIS based approach to back trajectory analysis for the source apportionment of aerosol  
460 constituents and its first application, *Journal of Atmospheric Chemistry*, 67, 1-28,  
461 10.1007/s10874-011-9199-9, 2010.

462 van Pinxteren, M., Fiedler, B., van Pinxteren, D., Iinuma, Y., Koertzing, A., and Herrmann,  
463 H.: Chemical characterization of sub-micrometer aerosol particles in the tropical Atlantic  
464 Ocean: marine and biomass burning influences, *Journal of Atmospheric Chemistry*, 72, 105-  
465 125, 10.1007/s10874-015-9307-3, 2015.

466 van Pinxteren, M., Barthel, S., Fomba, K., Müller, K., von Tümpling, W., and Herrmann, H.:  
467 The influence of environmental drivers on the enrichment of organic carbon in the sea surface  
468 microlayer and in submicron aerosol particles – measurements from the Atlantic Ocean, *Elem  
469 Sci Anth*, 5, <https://doi.org/10.1525/elementa.225>, 2017.

470 Wolke, R., Sehili, A. M., Simmel, M., Knoth, O., Tilgner, A., and Herrmann, H.: SPACCIM:  
471 A parcel model with detailed microphysics and complex multiphase chemistry, *Atmos.  
472 Environ.*, 39, 4375-4388, 10.1016/j.atmosenv.2005.02.038, 2005.

473 Wolke, R., Schroder, W., Schrodner, R., and Renner, E.: Influence of grid resolution and  
474 meteorological forcing on simulated European air quality: A sensitivity study with the modeling  
475 system COSMO-MUSCAT, *Atmos. Environ.*, 53, 110-130, 10.1016/j.atmosenv.2012.02.085,  
476 2012.  
477  
478  
479
